# Supplementary material for: Slow rewarming after hypothermia does not ameliorate white matter injury after hypoxia-ischemia in near-term fetal sheep
Source: Springer Nature journal article supplement (doi:10.1038/s41390-024-03332-y), 2024-08-05
Supplement: MOESM1 [file 41390_2024_3332_MOESM1_ESM.pdf]

**A**

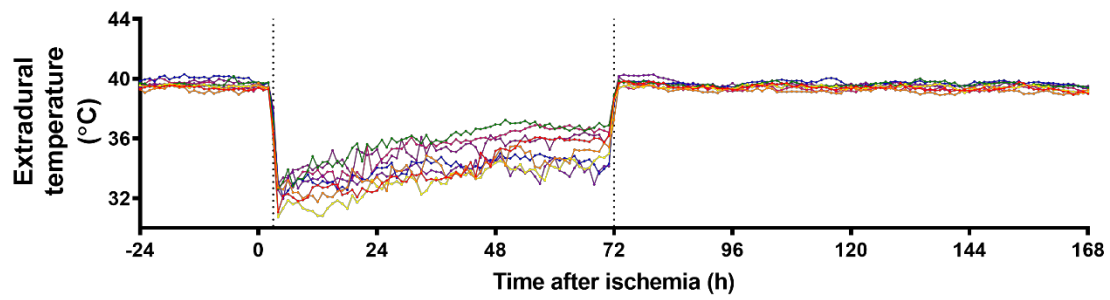

**B**

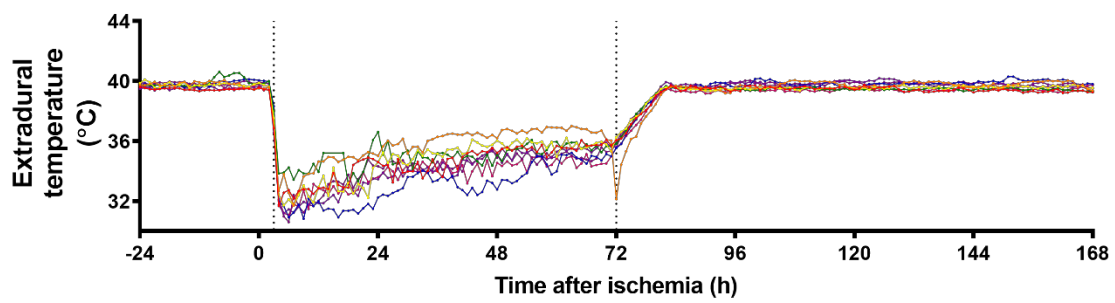

**Supplementary Figure 1: Extradural temperature for individual animals in the ischemia-hypothermia fast rewarming (A) and ischemia-hypothermia slow rewarming (B) groups.** Data shown is the hour average of extradural temperature. Dotted lines indicated the period when hypothermia was initiated and when rewarming began.

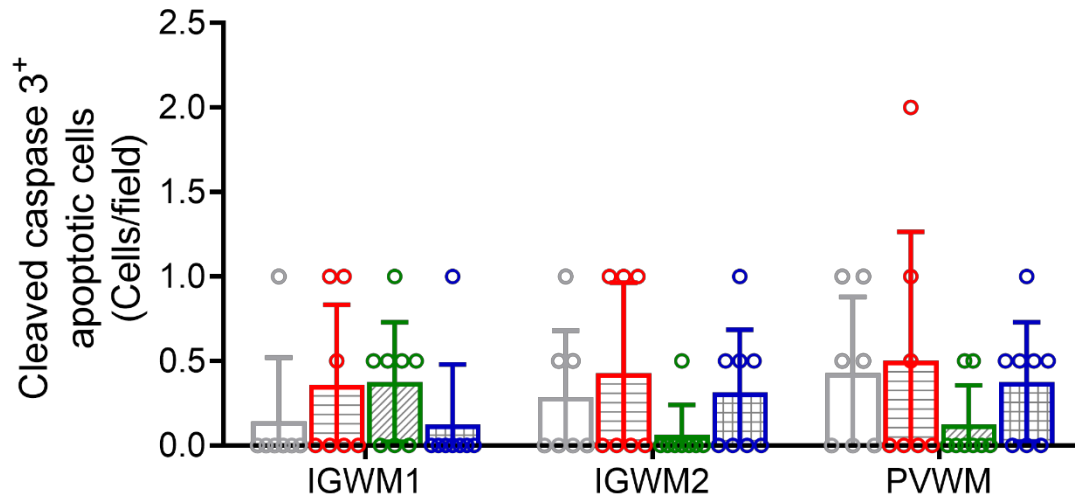

**Supplementary Figure 2: Cleaved caspase 3<sup>+</sup> apoptotic cell number in the IGWM1, IGWM2 and PVWM in the sham control, ischemia-normothermia, ischemia-hypothermia fast rewarming and ischemia-hypothermia slow rewarming groups 7 days post HI.** Sham control, n=8; ischemia-normothermia, n=7; ischemia-hypothermia fast rewarming, n=7; and ischemia-hypothermia slow rewarming groups n=8. Data are mean  $\pm$  standard deviation.
